# Supplementary material
Source: Research Square preprint supplement (doi:10.21203/rs.3.rs-9857445/v1)
Supplement: Supplementary file 1 [file 7a0b97dfb31962e897499937.docx]

**Table 1:** baseline characteristics of the study population.

| Characteristic | Number | Percentage |
| --- | --- | --- |
| Age  25 – 49  50 – 64  ≥ 65 | 490  532  224 | 39.3  42.7  18.0 |
| Marital status  Single  Married  Widowed  Divorced  Unknown | 83  576  40  256  291 | 6.7  46.2  3.2  20.6  23.4 |
| Education  No education  Primary  Secondary  Tertiary | 462  624  146  14 | 37.1  50.1  11.7  1.1 |
| Residence  Rural  Urban | 1,152  94 | 92.5  7.5 |
| Employment  Unemployed  Self-employed  Employed | 768  444  35 | 61.6  35.6  2.8 |
| HIV-status  Negative  Positive | 703  543 | 56.4  43.6 |
| Vaginal bleeding Yes  No | 888  358 | 71.3  28.7 |
| Pelvic pain Yes  No | 940  306 | 75.4  24.6 |
| Postcoital bleeding Yes  No | 32  1,214 | 2.6  97.4 |
| Vaginal discharge Yes  No | 864  382 | 69.3  30.7 |
| Histological sub-type  Adenocarcinoma  Squamous cell carcinoma | 110  1,136 | 8.8  91.2 |
| FIGO stage  Stage I  Stage II  Stage III  Stage IV | 88  687  410  61 | 7.1  55.1  32.9  4.9 |

**Table 2:** patient demographic and clinicopathological characteristics at cervical cancer diagnosis stratified by HIV status

| Characteristic | HIV-positive | HIV-negative | Number | *P-χ2* | p-value |
| --- | --- | --- | --- | --- | --- |
| Age category  25 – 49  50 – 64  ≥65 | 202  235  106 | 288  297  118 | 490  537  224 | 2.457 | 0.293 |
| Median age | 53(IQR:46 – 62) | 52(IQR:45 – 61) |  |  |  |
| Marital status  Single  Married  Widowed  Divorced  Unknown | 43  261  13  93  133 | 40  315  27  163  158 | 83  576  40  256  291 | 10.995 | 0.027 |
| Education  No education  Primary  Secondary  Tertiary | 168  290  80  5 | 294  334  66  9 | 462  624  146  14 | 19.731 | < 0.001 |
| Residence  Rural  Urban | 499  44 | 653  50 | 1152  94 | 0.431 | 0.511 |
| Employment status  Unemployed  Self-employed  Employed | 289  240  14 | 479  204  20 | 768  444  34 | 30.948 | < 0.001 |
| Symptoms experienced  Vaginal bleeding Yes  No  Pelvic pain Yes  No  Postcoital bleeding Yes  No  Vaginal discharge Yes  No | 418  125  417  126  16  527  400  143 | 470  233  523  180  16  687  464  239 | 888  358  940  306  32  1214  864  382 | 15.333  0.953  0.551  8.460 | < 0.001  0.329  0.458  0.004 |
| Cancer stage at diagnosis  Early stage  Advanced stage | 334  209 | 441  262 | 775  471 | 0.194 | 0.659 |
| Tumor diameter  ≤5cm  >5cm | 471  72 | 610  93 | 1081  165 | 0.003 | 0.987 |
| Histological type  Adenocarcinoma  Squamous cell carcinoma | 44  499 | 66  637 | 110  1136 | 0.629 | 0.428 |
| Lymphovascular invasion  Yes  No | 201  342 | 257  446 | 458  788 | 0.028 | 0.868 |
| Parametrial invasion  Yes  No | 196  347 | 251  452 | 447  799 | 0.024 | 0.886 |
| Deep stromal invasion  Less than 1/3  Between 1/3 and 2/3  More than 2/3 | 261  211  71 | 318  270  115 | 579  481  186 | 2.757 | 0.252 |
| Vaginal margin involvement  Yes  No | 217  326 | 259  444 | 476  770 | 1.264 | 0.261 |
| Pelvic lymphnode metastasis  Yes  No | 188  355 | 225  478 | 413  833 | 0.947 | 0.331 |
| Para-aortic lymphnode  Metastasis  Yes  No | 178  365 | 223  480 | 401  845 | 0.158 | 0.691 |
| Ovarian metastasis  Yes  No | 175  368 | 212  491 | 387  859 | 0.614 | 0.433 |
| Comorbidities  Yes  No | 182  361 | 206  497 | 388  858 | 2.538 | 0.111 |
| Treatment received  Surgery  Chemotherapy  Chemoradiotherapy  Chemotherapy & surgery | 5  348  21  166 | 11  476  19  193 | 16  824  40  359 | 3.924 | 0.270 |
| Diagnosis-treatment interval  1 – 30 days  31 – 60 days  ≥61 days | 414  92  37 | 537  109  57 | 951  201  94 | 1.074 | 0.585 |
| Treatment completion status  Completed  Interrupted  Ongoing | 126  226  191 | 204  207  292 | 330  433  483 | 20.177 | < 0.001 |
| Cancer recurrence  Yes  No | 27  516 | 37  666 | 64  1182 | 0.053 | 0.818 |
| Survival status  Alive  Dead  Unknown | 204  184  155 | 209  226  268 | 413  410  423 | 14.239 | 0.001 |
| Median follow-up time (months) | 7 (IQR: 4 –16) | | | | |
| Median Survival time (months) | 21(IQR: 6 – 28) | 32(IQR: 18 – 41) |  |  | < 0.001 |

***P-χ2***= Pearson’s chi-square test value

**Table 3:** Bivariate analysis of demographic and clinicopathological characteristics on recurrence-free survival and overall survival

| Characteristic Number | | Recurrence-free survival  HR (95% CI) p-value | | Overall survival  HR (95% CI) p-value | |
| --- | --- | --- | --- | --- | --- |
|  |  |  |  |  |  |
| Age as continuous variable | 1,246 | 1.004(0.996, 1.015) | 0.352 | 1.013(1.004, 1.023) | 0.007 |
| Marital status  Single  Married  Widowed  Divorced  Unknown | 83  576  40  256  291 | Ref.  0.948(0.640, 1.406)  1.315(0.734, 2.356)  0.914(0.588, 1.420)  1.181(0.777, 1.797) | 0.271  0.393  0.235  0.063 | Ref.  1.336(0.853, 2.094)  1.486(0.753, 2.934)  1.552(0.944, 2.551)  1.247(0.763, 2.040) | 0.206  0.254  0.083  0.378 |
| Education  No educ  Primary educ  Secondary educ  Tertiary educ | 462  624  146  14 | Ref.  1.039(0.824, 1.310)  0.820(0.539, 1.249)  0.753(0.227, 2.502) | 0.071  0.601  0.178 | Ref.  1.042(0.818, 1.328)  0.849(0.488, 0.956)  1.532(0.592, 3.962) | 0.739  < 0.001  0.379 |
| Employment  Unemployed  Self-employed  Employed | 768  444  34 | Ref.  1.186(0.593, 2.231)  0.896(0.711, 1.256) | 0.231  0.114 | Ref.  1.786(0.956, 2.892)  0.754(0.432, 1.341) | 0.276  0.112 |
| Residence  Rural  Urban | 1,152  94 | Ref.  0.787(0.514, 1.204) | 0.269 | Ref.  0.777(0.511, 1.183) | 0.239 |
| HIV status  Negative  Positive | 703  543 | Ref.  1.125(0.914, 1.386) | 0.235 | Ref.  0.859(0.693, 1.066) | 0.168 |
| Histological type  Adenocarcinoma  Squamous carcinoma | 110  1,136 | Ref.  0.810(0.574, 1.144) | 0.232 | Ref.  1.589(1.017, 2.482) | 0.042 |
| Cancer stage  Early stage  Advanced stage | 775  471 | Ref.  1.124(0.683, 1.849) | 0.647 | Ref.  0.708(0.317, 1.580) | 0.399 |
| Lymphovascular invasion  No  Yes | 788  458 | Ref.  1.411(0.890, 2.237) | 0.143 | Ref.  1.257(0.653, 2.421) | 0.493 |
| Parametrial invasion  No  Yes | 799  447 | Ref.  0.796(0.478, 1.326) |  | Ref.  0.961(0.403, 2.292) | 0.929 |
| Deep stromal invasion  Less than 1/3  Between 1/3 and 2/3  Greater than 2/3 | 481  579  186 | Ref.  1.016(0.728, 1.419)  0.937(686, 1.279) | 0.925  0.682 | Ref.  1.033(0.875, 1.663)  1.186(0.934, 2.164) | 0.672  0.211 |
| Pelvic lymph node metastasis  No  Yes |  | Ref.  1.525(1.039, 1.891) | 0.017 | Ref.  1.103(0.551, 2.205) | 0.782 |
| Para-aortic lymph node metastasis  No  Yes | 845  401 | 1.0  1.617(1.002, 2.610) | 0.049 | 1.363(0.642, 2.892) | 0.782 |
| Vaginal margin-involvement  No  Yes | 770  476 | Ref.  1.390(0.889, 2.173) | 0.149 | Ref.  0.811(0.463, 1.418) | 0.461 |
| Ovarian metastasis  No  Yes | 859  387 | Ref.  1.227(1.042, 2.093) | 0.047 | Ref.  1.223(0.656, 2.279) | 0.526 |
| Comorbidities  No  Yes | 858  388 | Ref  1.355(1.023, 1.795) | 0.034 | Ref.  0.986(0.684, 1.423) | 0.941 |
| Treatment  Surgery  Chemotherapy  Chemoradiotherapy  Chemotherapy & surgery | 16  824  40  359 | Ref.  0.352(0.107, 1.157)  0.465(0.126, 1.716)  0.302(0.091, 0.989) | 0.086  0.251  0.044 | Ref.  0.773(0.242, 2.465)  1.405(0.388, 3.085)  0.878(0.276, 2.794) | 0.663  0.604  0.825 |
| Treatment-Dx interval  1 – 30 days  31 – 60 days  ≥ 61 days | 951  201  94 | Ref.  0.838(0.641, 1.097)  0.862(0.564, 1.319) | 0.199  0.494 | Ref.  0.669(0.478, 0.936)  0.571(0.365, 0.893) | 0.019  0.014 |
| Treatment duration  1 – 15 months  16 – 30 months  31 – 49 months | 1,110  127  9 | Ref.  0.162(0.112, 0.234)  0.104(0.067, 0.520) | < 0.001  0.005 | Ref.  0.277(0.209, 0.368)  0.113(0.041, 0.316) | < 0.001  < 0.001 |
| Treatment completion  Completed  Interrupted  Ongoing | 330  433  483 | Ref.  1.317(0.949, 1.828)  1.027(0.722, 1.462) | 0.099  0.880 | Ref.  1.401(1.206, 1.914)  2.607(2.037, 3.337) | 0.034  < 0.001 |
| Tumor diameter  < 5cm  ≥ 5cm | 1,081  165 | Ref.  1.102(1.067, 2.112) | 0.396 | Ref.  0.665(0.397, 1.114) | 0.121 |
| Adverse effects  No  Yes  Not known | 712  413  121 | Ref.  0.892(0.655, 1.214)  1.333(0.877, 1.846) | 0.469  0.339 | Ref.  0.329(0.165, 0.657)  0.743(0.585, 0.944) | 0.002  0.015 |

**Ref =** Reference category; **HR** = Hazard Ratio

**Table 4:** Multivariable analysis of demographic and clinicopathologic characteristics on recurrence-free and overall survival

| Characteristic Number | | Recurrence-free survival  aHR (95% CI) p-value | | Overall survival  aHR (95% CI) p-value | |
| --- | --- | --- | --- | --- | --- |
|  |  |  |  |  |  |
| Age  25 – 52  ≥ 53 | 647  599 |  |  | Ref.  1.559(1.169, 2.078) | 0.002 |
| Education  No educ  Primary educ  Secondary educ  Tertiary educ | 462  624  146  14 |  |  | Ref.  1.042(0.818, 1.328)  0.811(0.588, 1.656)  0.932(0.492, 2.364) | 0.739  < 0.001  0.379 |
| HIV status  Positive  Negative | 703  543 | Ref.  0.903(0.751, 1.086) | 0.278 | Ref.  0.659(0.542, 0.801) | < 0.001 |
| Histological type  Adenocarcinoma  Squamous carcinoma | 110  1,136 |  |  | Ref.  1.346(1.011, 2.482) | 0.031 |
| Cancer stage  Early stage  Advanced stage | 775  471 | Ref.  2.009(1.210, 3.339) | 0.007 |  |  |
| Tumor diameter  < 5cm  ≥ 5cm | 1,081  165 | Ref.  1.285(1.014, 1.629) | 0.038 | Ref.  1.215(0.893, 1.326) | 0.064 |
| Parametrial invasion  No  Yes | 799  447 | Ref.  1.193(0.738, 1.929) | 0.472 |  |  |
| Vaginal margin-involvement  No  Yes | 770  476 | Ref.  1.189(0.770, 1.834) | 0.435 |  |  |
| Treatment  Surgery  Chemotherapy  Chemoradiotherapy  Chemotherapy surgery | 16  824  40  359 | Ref.  0.369(0.164, 1.177)  0.487(0.134, 1.806)  0.292(0.087, 0.778) | 0.094  0.265  0.041 | Ref.  0.630(0.198, 2.006)  1.200(0.458, 3.285)  0.474(0.235, 2.383) | 0.434  0.779  0.623 |
| Treatment-Dx interval  1 – 30 days  31 – 60 days  ≥ 61 days | 951  201  94 | Ref.  1.029(0.812, 1.304)  1.034(0.701, 1.525) | 0.813  0.869 | Ref.  0.902(0.581, 1.401)  0.547(0.286, 1.047) | 0.645  0.069 |
| Treatment duration  1 – 15 months  16 – 30 months  31 – 49 months | 1,110  127  13 | Ref.  0.247(0.177, 0.346)  0.089(0.022, 0.362) | < 0.001  0.001 | Ref.  0.299(0.228, 0.393)  0.113(0.041, 0.316) | < 0.001  < 0.001 |
| Treatment completion  Completed  Interrupted  Ongoing | 330  433  483 | Ref.  3.017(2.356, 3.863)  0.970(0.732, 1.287) | < 0.001  0.834 | Ref.  1.472(1.093, 1.981)  2.569(2.014, 3.277) | 0.011  < 0.001 |
|  |  |  |  |  |  |
| Adverse effects  No  Yes | 712  413 | Ref.  1.655(1.259, 2.175) | 0.469 | Ref.  0.329(0.1 | 0.002 |
| *HIV_status*Age*  NegativeAge≥ 53 |  |  |  | 0.621(0.416, 0.926) | 0.020 |
| *HIV_status*Histological subtype*  Negative_squamous |  |  |  | 0.284(0.116, 0.692) | 0.006 |
|  |  |  |  |  |  |

**Ref =** Reference category; **aHR** = adjusted Hazard Ratio; **HIV_status*Age** = interaction between HIV status and Age; **HIV_status*Histological subtype** = Interaction between HIV_status and Histological subtype
